# Supplementary material for: Leveraging large observational studies to discover genetic determinants of drug concentrations: A proof‐of‐concept study
Source: PubMed Central journal article supplement — Clin Transl Sci. 2022 Feb 5;15(4):1063–73. doi: 10.1111/cts.13230 (PMC9010273; doi:10.1111/cts.13230), 2022-02-05
Supplement: CTS-15-1063-s005.pdf [file CTS-15-1063-s005.pdf]

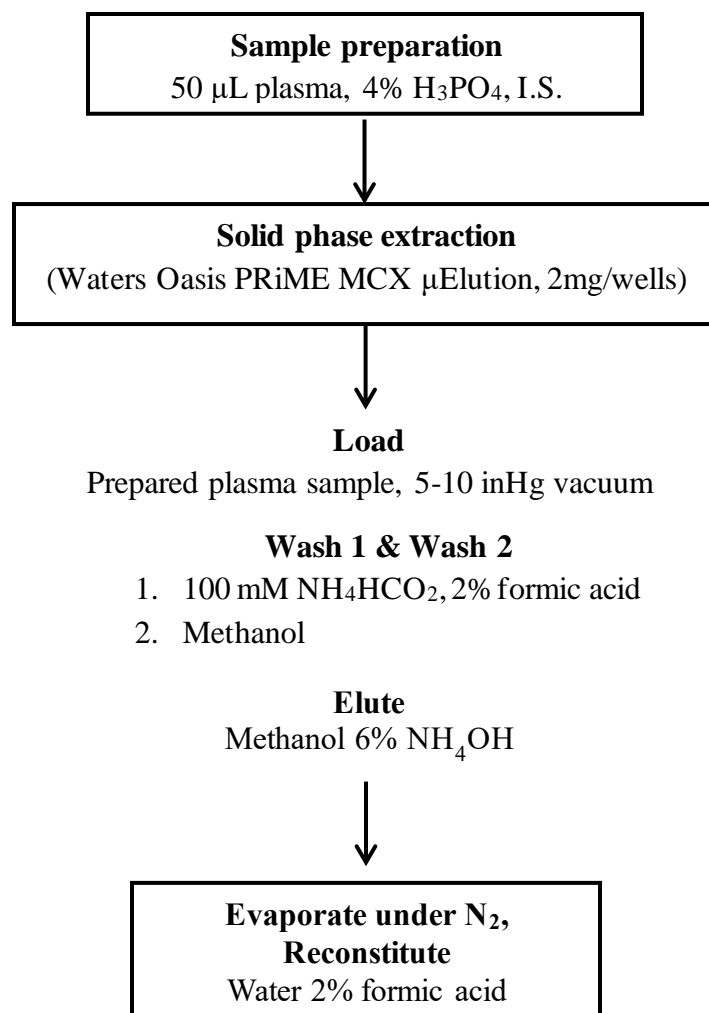

**Figure S1.** Sample preparation method for metoprolol and  $\alpha$ -OH-metoprolol quantification in human plasma. I.S., internal standards.
